# Supplementary material for: Nitric Oxide-cGMP Signaling Stimulates Erythropoiesis through Multiple Lineage-Specific Transcription Factors: Clinical Implications and a Novel Target for Erythropoiesis
Source: PubMed Central journal article supplement (PMC4699757; doi:10.1371/journal.pone.0144561), 2016-01-04
Supplement: pone.0144561.s002.pdf [file pone.0144561.s002.pdf]

**Table S1. Copy number of the transgenes in sGC transgenic mice \***

| Line # | sGC $\alpha$ (copies) | sGC $\beta$ (copies) |
|--------|-----------------------|----------------------|
| sGC-5  | 4                     | 4                    |
| sGC-7  | 3                     | 2                    |
| sGC-8  | 1                     | 2                    |
| sGC-9  | 3                     | 3                    |

\* Copy numbers of sGC transgenic mice were determined as described above.
