# Supplementary material for: Nitric Oxide-cGMP Signaling Stimulates Erythropoiesis through Multiple Lineage-Specific Transcription Factors: Clinical Implications and a Novel Target for Erythropoiesis
Source: PLOS journal article supplement (doi:10.1371/journal.pone.0144561), 2016-01-04
Supplement: S3 (10.1371/journal.pone.0144561.s003) [file journal.pone.0144561.s003]

**Table S2 Hematologic data of sGC transgenic mice and non-transgenic littermates.**

|                                   | Tg(-) mice<br>(n=7) | sGC-5<br>(n=6)   | sGC-7<br>(n=5)   |
|-----------------------------------|---------------------|------------------|------------------|
| RBC ( $10^6/\mu\text{l}$ )        | 8.7 $\pm$ 0.4       | 11.3 $\pm$ 0.6 * | 10.8 $\pm$ 0.4 * |
| Hemoglobin (g/dl)                 | 14.2 $\pm$ 0.6      | 16.3 $\pm$ 1.1 * | 15.8 $\pm$ 0.8 * |
| Hematocrit (%)                    | 48.6 $\pm$ 0.8      | 51.8 $\pm$ 1.4 * | 50.8 $\pm$ 0.9 * |
| MCV (fl)                          | 50.7 $\pm$ 2.1      | 46.7 $\pm$ 3.3   | 47.0 $\pm$ 3.7   |
| MCH (pg/cell)                     | 14.8 $\pm$ 0.8      | 14.5 $\pm$ 0.9   | 14.6 $\pm$ 1.0   |
| MCHC (g/dl)                       | 29.8 $\pm$ 1.4      | 31.4 $\pm$ 1.2   | 31.1 $\pm$ 1.1   |
| Reticulocytes (%)                 | 3.9 $\pm$ 0.5       | 3.0 $\pm$ 0.7    | 3.3 $\pm$ 0.6    |
| Leucocytes ( $10^3/\mu\text{l}$ ) | 9.8 $\pm$ 1.1       | 6.7 $\pm$ 1.5 *  | 6.4 $\pm$ 0.8 *  |
| Platelets ( $10^6/\mu\text{l}$ )  | 1.09 $\pm$ 0.18     | 1.12 $\pm$ 0.33  | 1.04 $\pm$ 0.21  |

Hematologic data of each mouse group were obtained from 5 to 7 mice.

\* P < 0.05 compared to Tg(-) non-transgenic littermates.
